# Supplementary material for: The failure to express a protein disulphide isomerase-like protein results in a floury endosperm and an endoplasmic reticulum stress response in rice
Source: PubMed Central journal article supplement — J Exp Bot. 2011 Oct 6;63(1):121–30. doi: 10.1093/jxb/err262 (PMC3245461; doi:10.1093/jxb/err262), 2011-10-06
Supplement: supp_err262_00064634_file001.pdf [file supp_err262_00064634_file001.pdf]

**The failure to express a protein disulphide isomerase like protein results in a  
floury endosperm and an endoplasmic reticulum stress response in rice**

*Authors: Han Xiaohua, Wang Yihua, Liu Xi, Jiang Ling, Ren Yulong, Liu Feng, Peng  
Cheng, Li Jingjing, Jin Ximing, Wu Fuqing, Wang Jiulin, Guo Xiuping, Zhang Xin,  
Cheng Zhijun, Wan Jianmin*

**Supplementary Material**

**Table S1.** Primer sequences used.

| Primer name | Gene         | Forward Sequence (5'→3')    | Reverse Sequence (5'→3') | Purpose          |
|-------------|--------------|-----------------------------|--------------------------|------------------|
| RM167       |              | GATCCAGCGTGAGGAACACGT       | AGTCCGACCACAAGGTGCGTTGTC | Mapping          |
| B11-15      |              | CCATGGCGTAGCATATCAAA        | GCTGATTGCCTCGAGTAAAG     | Mapping          |
| T3612-4-1   |              | CGTTCGCACACTCACTCATA        | TCGTTCTTTCCAAGATTAGA     | Mapping          |
| T3612-31    |              | GTCAAATGGACAAACTTCTT        | CCTCTATAAAGTGCCCTGTA     | Mapping          |
| T3612-41    |              | TTTGGTCCCAGATTGGTAGA        | GGCGAACCAATAACAATAGC     | Mapping          |
| T3612-45    |              | CAATGAAGGCTATCTGTGTG        | ATAGATCGCTTATCTTGGCA     | Mapping          |
| T3612-54    |              | AATTCCCCCTATATAACAAT        | AAGTTTAGAGGAGTATTTGG     | Mapping          |
| T3612-55    |              | CTCCCGATTCTGACCCGCTC        | CGCCGAGTTCGATGGAGATC     | Mapping          |
| PDI-2F      | Os11g0199200 | AAAGCCACCCCACTCTCCG         |                          | cDNA Clone       |
| PDI-2R      | Os11g0199200 |                             | TGTTAGCCGTCAGGTCCCGT     | cDNA Clone       |
| DEL-1F      |              | TTGTGGAGACCGTGGCTTTG        |                          | Clone            |
| DEL-1R      |              |                             | GCTCAGGAACGCTTCGCTGT     | Clone            |
| DEL-2F      |              | TTTCCTGGCTTCGCATCACG        |                          | Clone            |
| Actin1      | Os03g0718100 | TGGAAGTGGTATGGTCAAGGC       | AGTCTCATGGATACCCGCAG     | RT-PCR           |
| PDIL1-1     | Os11g0199200 | AAGTCACCAGAAGACGCAAC        | TCAATGTCACCAATGAGGAA     | RT-PCR           |
| Ubiquitin   | Os03g0234200 | GCTCCGTGGCGGTATCAT          | CGGCAGTTGACAGCCCTAG      | Real-Time RT-PCR |
| bZIP17      | Os07g0644100 | TGGTTATTAAGTCCATTGTTGCGAGTG | AGTCTCCTCCTTTCCTTGGTTTCC | Real-Time RT-PCR |
| bZIP28      | Os05g0411300 | CCAAGGGAGGCTGGTAATG         | AAAGGAAGCGTGCAGGAGTA     | Real-Time RT-PCR |
| bZIP60      | Os06g0622700 | CGCCAGAGCTTGTTGAAGGATAGG    | GCGGCAGGGTTTCCGTGAGTA    | Real-Time RT-PCR |
| PDIL1-4     | Os02g0100100 | GCCATCGTGTCTGTTGGTCA        | GCCTCGAAGCAGCAGCAATC     | Real-Time RT-PCR |
| PDIL2-1     | Os05g0156300 | CCCCACATTGAAATTCTTCCC       | AATCACGGCTGGTTCCACA      | Real-Time RT-PCR |
| PDIL2-2     | Os01g0339900 | TACGATGGCGGCAGGGAGT         | TTGCGAGGGCATCCAAACT      | Real-Time RT-PCR |
| PDIL2-3     | Os09g0451500 | TTTCCAGCTTGATGAAATAACTGAG   | TCACCATCTTTGCCGTCC       | Real-Time RT-PCR |

**Table S1. (Continued)**

| Primer name             | Gene         | Forward Sequence (5'→3')  | Reverse Sequence (5'→3')  | Purpose          |
|-------------------------|--------------|---------------------------|---------------------------|------------------|
| PDIL5-1                 | Os03g0287900 | TGGTTTGTGAAGTTCTGCGTTCC   | CCACAGTCCACTTGCCCTATCTC   | Real-Time RT-PCR |
| PDIL5-2                 | Os04g0432500 | GCAATCCCTGCTTCCTTTG       | GTTTCATCTGAATCATCTCCAA    | Real-Time RT-PCR |
| PDIL5-3                 | Os02g0550300 | TAACCCAAAGTATCGTGAGCAGAG  | GCACAATAAAGGCAGAAGGGA     | Real-Time RT-PCR |
| PDIL5-4                 | Os07g0524100 | TTGTAATCTCAGCTCGATCTGGT   | AACATCTTTGCCGATAGCCTTTT   | Real-Time RT-PCR |
| Bip-1                   | Os02g0115900 | CTTTGACGGGACCGATTCT       | CATGGTCTTGCGGAACAGAT      | Real-Time RT-PCR |
| Bip-2                   | Os06g0212900 | ACCCTGGTGCAGATGGACTCGC    | CCGCCGACGACAAGAACCTC      | Real-Time RT-PCR |
| HSP70-1                 | Os02g0710900 | AAAGTACAGTAGCCGCAATTTATCT | TCAATCACTGCTTCTGCCCTAT    | Real-Time RT-PCR |
| HSP90                   | Os06g0716700 | GACTTCGCCTCCAGCATCTA      | CGACCTCCTCTTCTCTTCC       | Real-Time RT-PCR |
| CNX                     | Os04g0402100 | TGTTTGGTCCTGACAAATGTGGAT  | AAGGTGGGAACCTTGAGGTGGTGTT | Real-Time RT-PCR |
| CRT-1                   | Os07g0246200 | ATGAGAACATGGCTGGTGAATG    | TCTGGGTACTCCGCTGAAATAG    | Real-Time RT-PCR |
| CRT-2                   | Os03g0832200 | GAGGATGAGGCGGACGATGA      | CCTTGATGTCTGCGGTTTC       | Real-Time RT-PCR |
| NEF                     | Os09g0512700 | ATTAAAGATGCCGTCAGATGCT    | GTCAATGGGCTCAACGAGAAT     | Real-Time RT-PCR |
| ERDJ3-like              | Os05g0156500 | AACTGTTACAATCTCCCTGCTC    | GGTGCCAATTTCCACCATA       | Real-Time RT-PCR |
| Stt3a                   | Os04g0675500 | CTCGGCGTTCGGCTACTTCT      | GCACGTACAGCGCAACAGAT      | Real-Time RT-PCR |
| UDP glucose transporter | Os06g0593100 | GGGTGTATCATCCTTTGCGTTGT   | AATCTTGGGTCTGAATTGGTGTA   | Real-Time RT-PCR |
| Derlin                  | Os03g0852200 | TACAAGCAATGTTCCCGTGTATT   | CTTCACCCTTCGTGTCCAGTT     | Real-Time RT-PCR |

**Table S2.** The 11 predicted genes present in the candidate region of chromosome 11 containing the floury endosperm mutation of *T3612*.

| Number | Gene                                                                                                                                                     |
|--------|----------------------------------------------------------------------------------------------------------------------------------------------------------|
| 1      | putative Vhs Domain Of Tom1 Protein From H. Sapiens                                                                                                      |
| 2      | putative pupative polyprotein                                                                                                                            |
| 3      | putative E3 ubiquitin-protein ligase CBL-B (Signal transduction protein CBL-B) (SH3-binding protein CBL-B) (Casitas B-lineage lymphoma proto-oncogene b) |
| 4      | putative Zinc finger CCHC domain-containing protein 10                                                                                                   |
| 5      | putative gag-pol precursor                                                                                                                               |
| 6      | unknown protein similar to retrotransposon protein, unclassified                                                                                         |
| 7      | <b>putative Protein disulfide-isomerase precursor (PDI)</b>                                                                                              |
| 8      | putative E3 ubiquitin-protein ligase MIB2 (Mind bomb homolog 2) (RBSC-skeletrophin/dystrophin-like polypeptide)                                          |
| 9      | putative ankyrin repeat family protein                                                                                                                   |
| 10     | unknown protein similar to retrotransposon protein, unclassified                                                                                         |
| 11     | putative Reverse transcriptase (RNA-dependent DNA polymerase) domain containing protein                                                                  |

## **Figure legends**

**Figure S1.** The part of sequence of deletion boundary in *T3612*.

**Figure S2.** Genomic PCR from four independent T<sub>1</sub> complemented lines (A582-6, -9, -10 and -11). Lane 1: cv. Nipponbare; lane 2: *T3612*.

**Figure S3.** Expression levels of various genes involved in starch synthesis. Each value reported is the mean  $\pm$  standard deviation of three biological replicates.

**Figure S4.** SDS-PAGE analysis of total mature grain protein.

**Figure S5.** TEM images of the developing endosperm of (A) cv. Nipponbare, (B) *T3612*.

**Figure S6.** Expression levels of various genes involved in grain storage protein synthesis. Each value reported is the mean  $\pm$  standard deviation of three biological replicates.

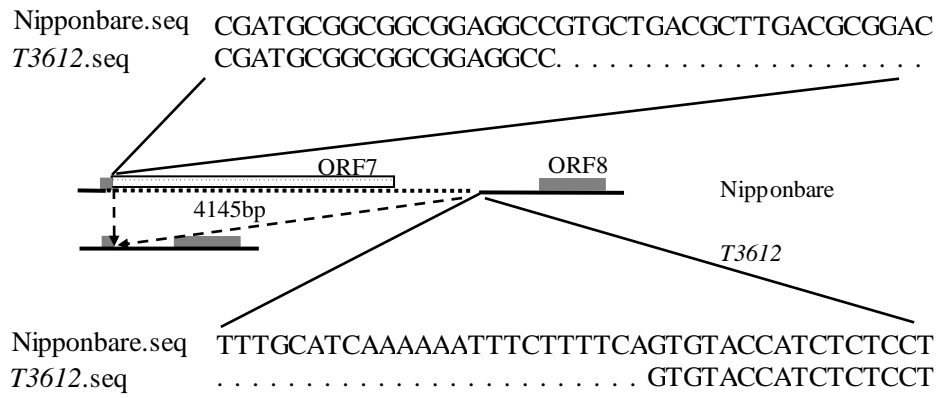

**Figure S1.** The part of sequence of deletion boundary in *T3612*.

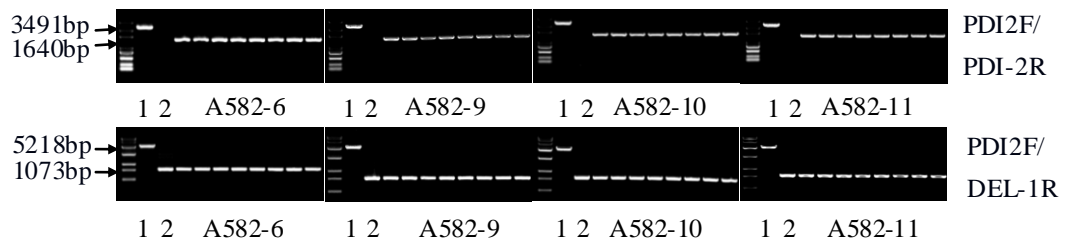

**Figure S2.** Genomic PCR from four independent  $T_1$  complemented lines (A582-6, -9, -10 and -11). Lane 1: cv. Nipponbare; lane 2: *T3612*.

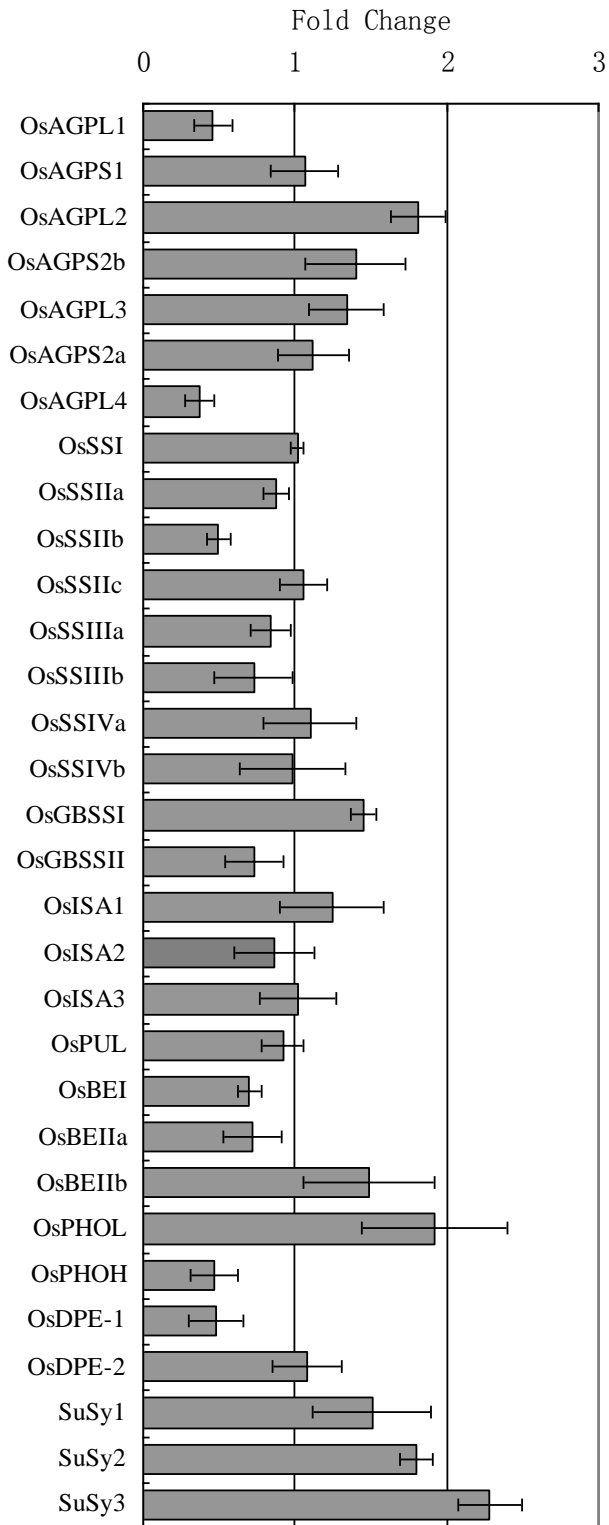

**Figure S3.** Expression levels of various genes involved in starch synthesis. Each value reported is the mean  $\pm$  standard deviation of three biological replicates.



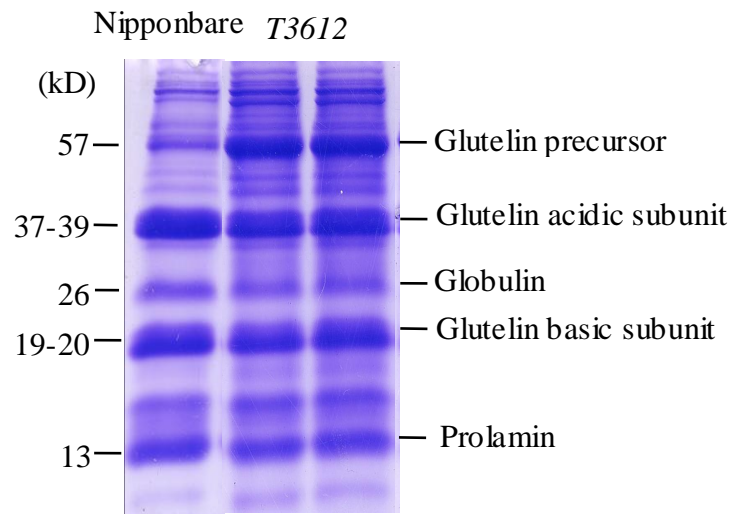

**Figure S4.** SDS-PAGE analysis of total mature grain protein.

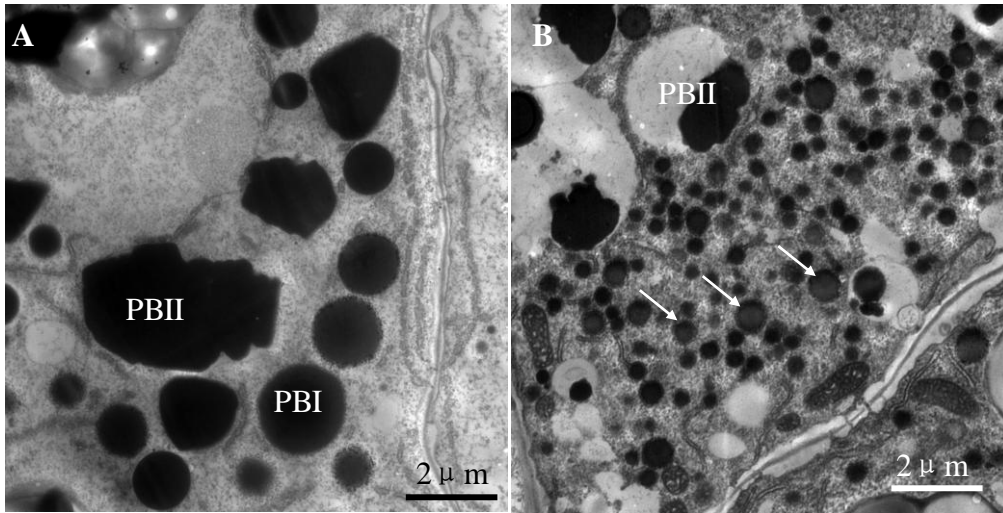

**Figure S5.** TEM images of the developing endosperm of (A) cv. Nipponbare, (B) *T3612*.

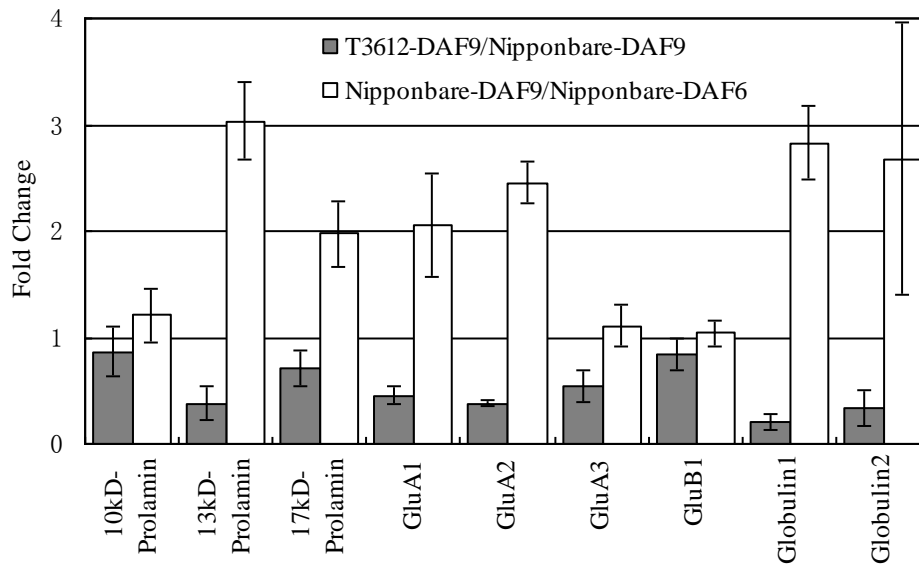

**Figure S6.** Expression levels of various genes involved in grain storage protein synthesis. Each value reported is the mean  $\pm$  standard deviation of three biological replicates.
